# Supplementary figures and images for: Genetic Determinants of Fiber-Associated Traits in Flax Identified by Omics Data Integration
Source: MDPI journal article supplement (doi:10.3390/ijms232314536), 2022-11-22

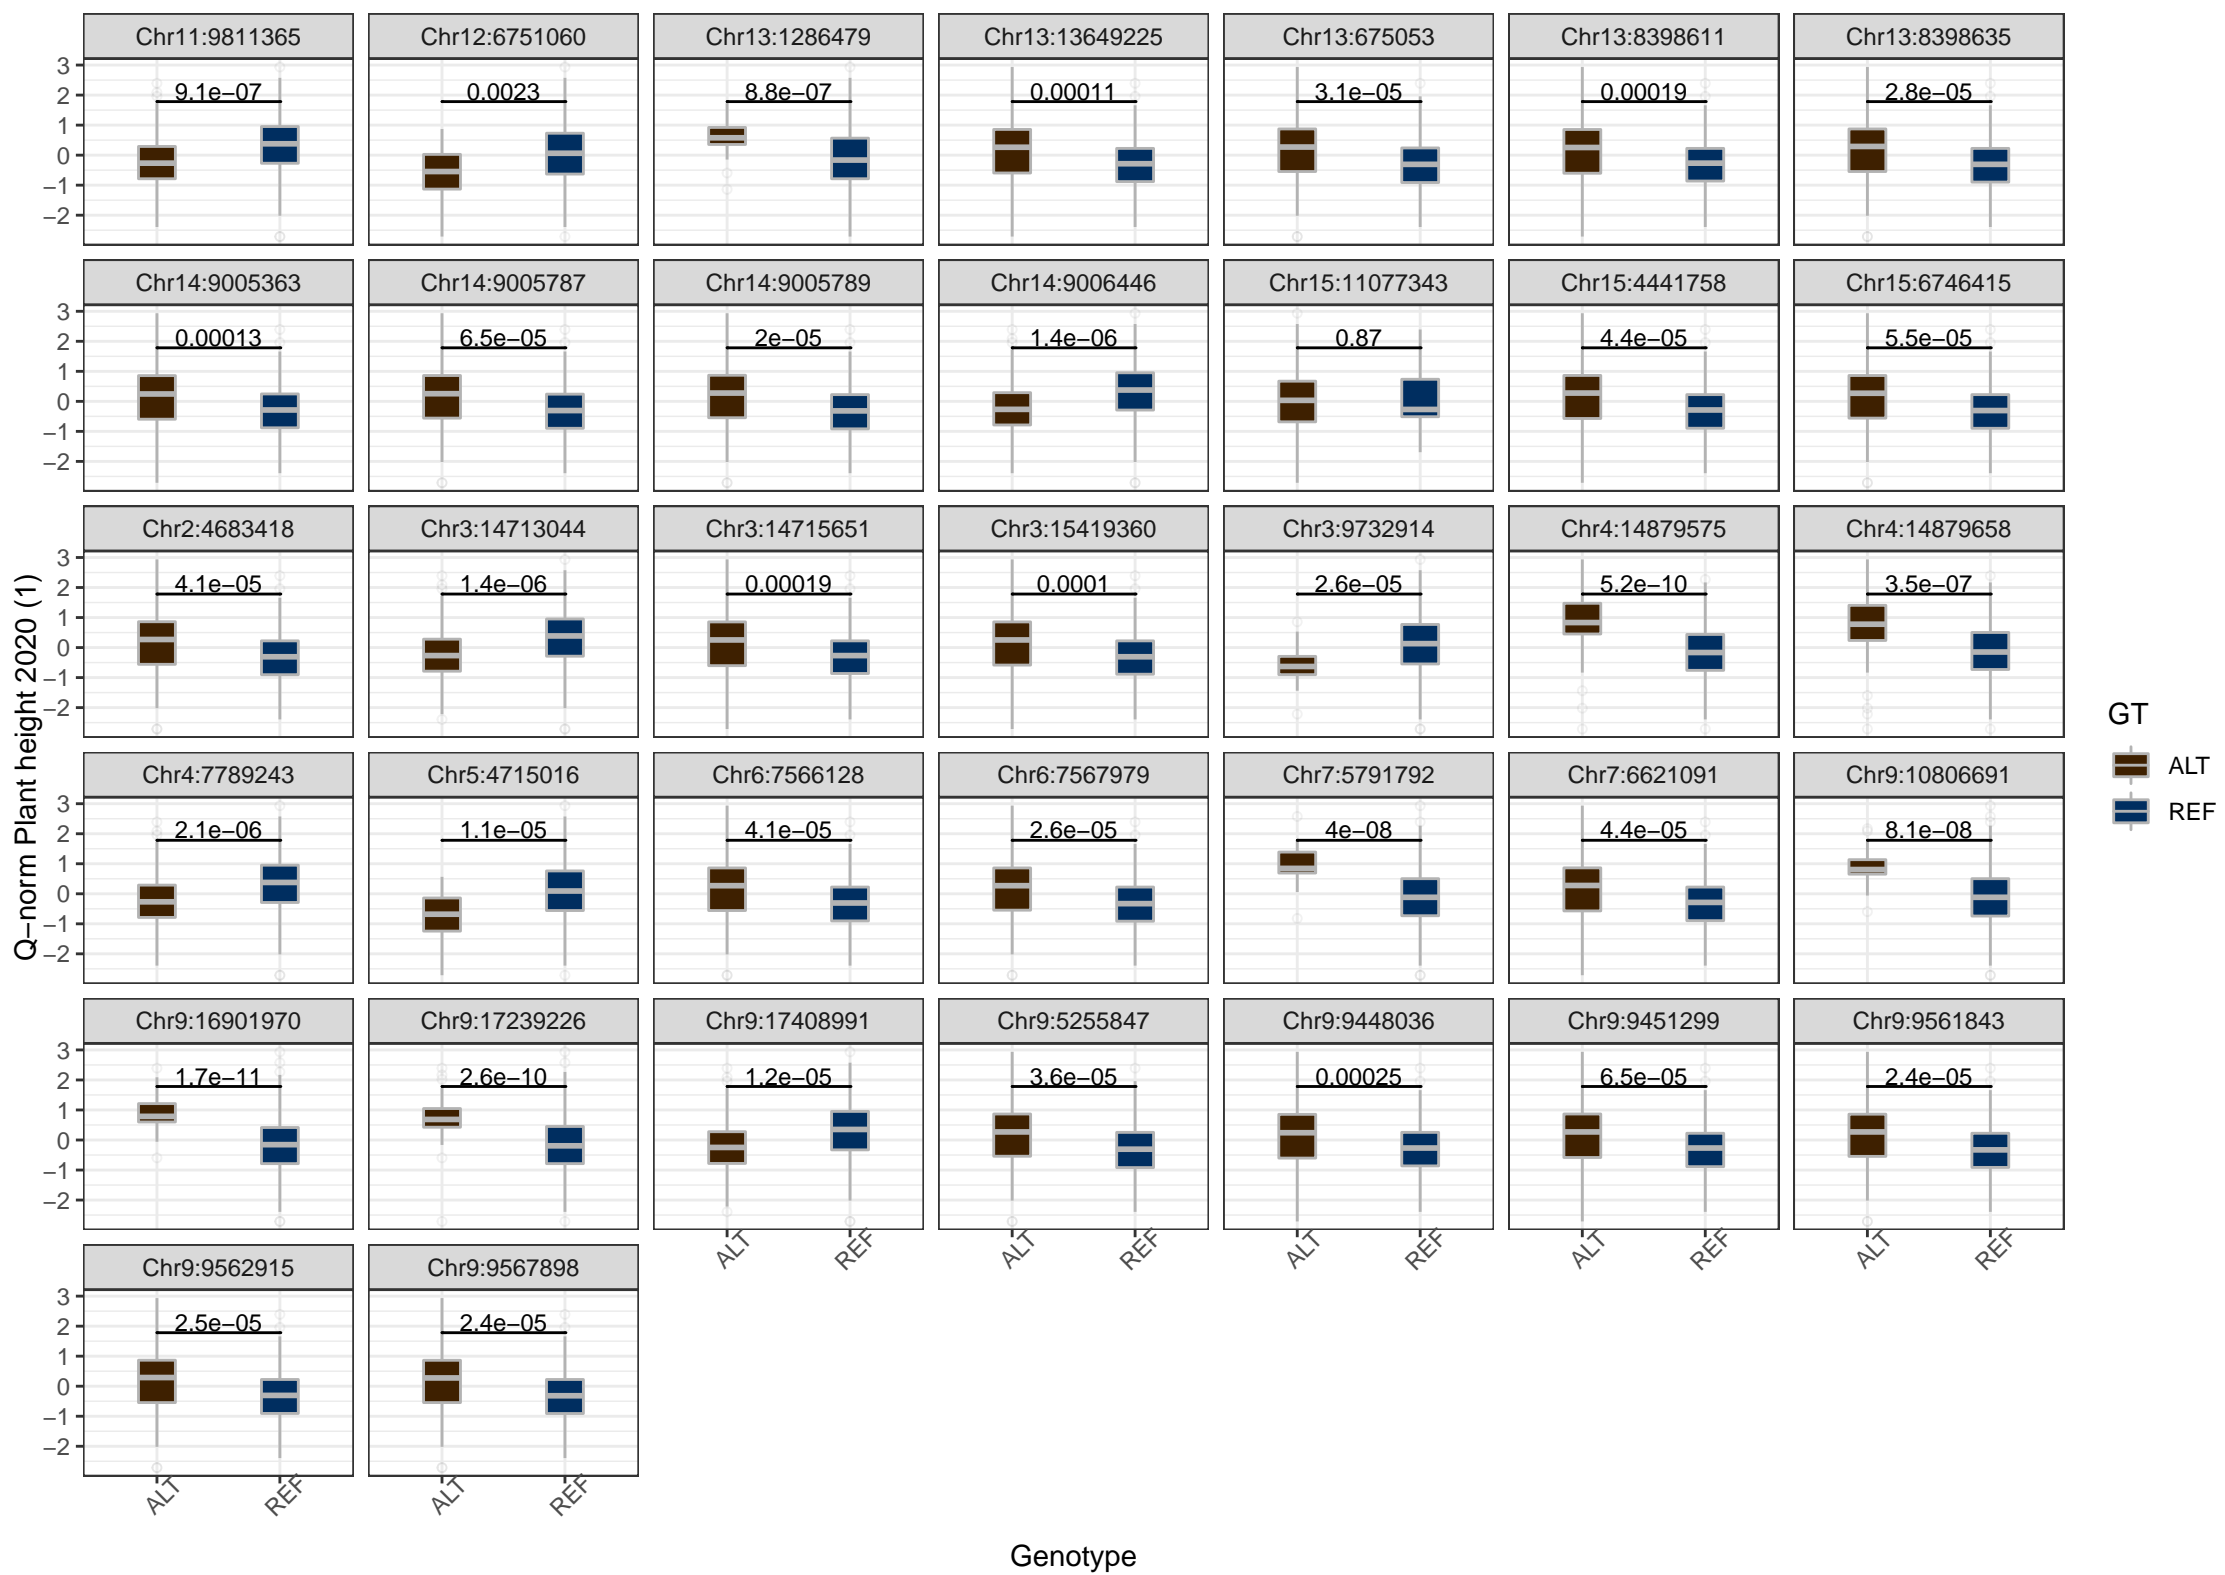

Supplement: s1 [file s1]

Q-norm Plant height 2020 (2)

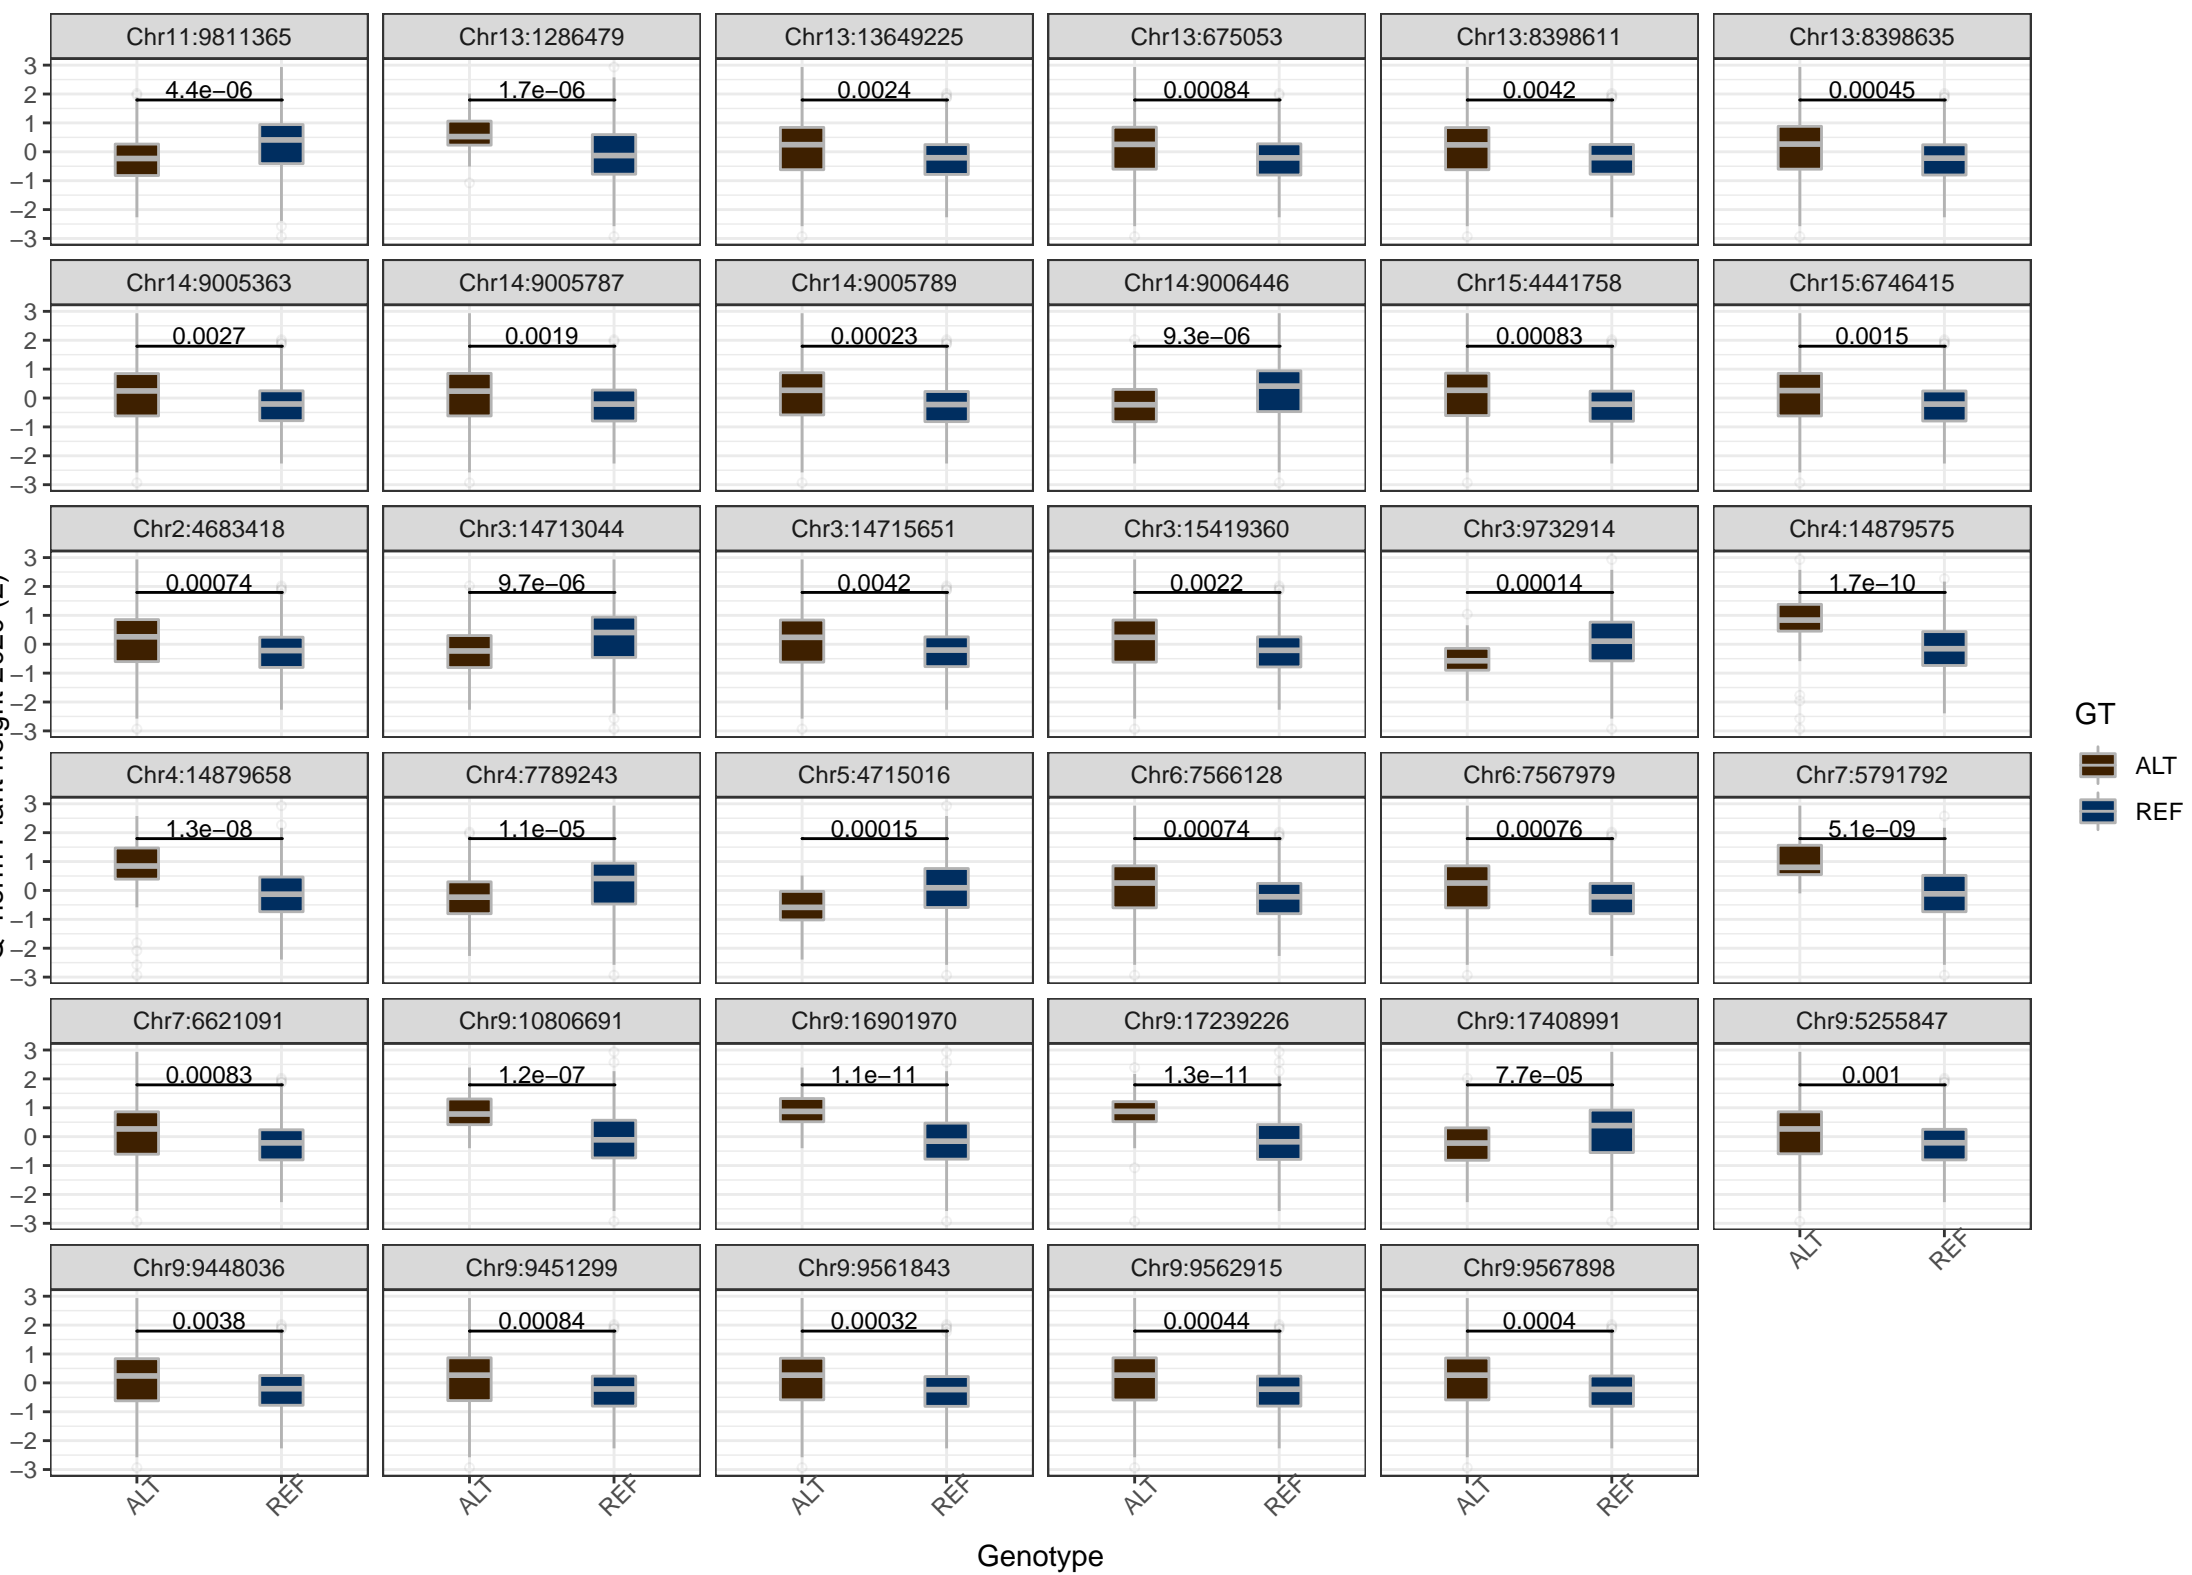

Supplement: s1 [file s1]
